# Supplementary material for: mHealth Assessment: Conceptualization of a Global Framework
Source: PubMed Central journal article supplement (PMC5434253; doi:10.2196/mhealth.7291), 2017-05-02
Supplement: mhealth_v5i5e60_app1.pdf [file mhealth_v5i5e60_app1.pdf]

|                                                                                                                                             | EC[39] | Catalonia[40] | Andalucía[35] | FI-STAR[42,43] |
|---------------------------------------------------------------------------------------------------------------------------------------------|--------|---------------|---------------|----------------|
| The model is applicable to all mHealth solutions, as opposed to merely medical devices                                                      | Y      | Y             | Y             | N              |
| Stakeholders from multiple fields were involved in the creation of the model                                                                | P      | Y             | Y             | N              |
| Stakeholders from multiple fields are given roles within the model for practical assessment of apps                                         | P      | Y             | P             | N              |
| The results of assessment are/will be publically available and easily accessible, i.e. clear and understandable lay language                | Y      | Y             | Y             | N              |
| The model assess the credibility of the developer as well as the app, given its intended use and assigned risk level                        | N      | Y             | Y             | NS             |
| The model adapts to the level of app development, i.e. from developmental to observational testing to apps already on the market            | N      | Y             | N             | Y              |
| The model addresses the concept of potential app-integration within the medical system                                                      | Y      | P             | NS            | Y              |
| The model equally covers risks or perspectives of patient as well as medical personnel users                                                | Y      | P             | P             | NS             |
| The model assesses an app's infrastructure, given its intended use and risk, e.g. potential interoperability, support services, user-guides | Y      | P             | P             | Y              |
| The model includes references to information and security standards as resources for evaluation teams                                       | Y      | N             | N             | Y              |
| The model is applicable to more than one country or regional medical system                                                                 | Y      | NS            | Y             | Y              |
| The model allows for use of novel evaluation methods to expedite the collection and reporting of results                                    | NS     | NS            | NS            | N              |
