# Supplementary material for: mHealth Assessment: Conceptualization of a Global Framework
Source: PubMed Central journal article supplement (PMC5434253; doi:10.2196/mhealth.7291), 2017-05-02
Supplement: mhealth_v5i5e60_app2.pdf [file mhealth_v5i5e60_app2.pdf]

|                                | User                                                                                                                                                                                                                                                                                                                                 | Organization                                                                                                                                                                                                                                                                                                                                     | Healthcare System                                                                                                                                                                                                                                                             | Society                                                                                                                                                                                                                                                                                                                   |
|--------------------------------|--------------------------------------------------------------------------------------------------------------------------------------------------------------------------------------------------------------------------------------------------------------------------------------------------------------------------------------|--------------------------------------------------------------------------------------------------------------------------------------------------------------------------------------------------------------------------------------------------------------------------------------------------------------------------------------------------|-------------------------------------------------------------------------------------------------------------------------------------------------------------------------------------------------------------------------------------------------------------------------------|---------------------------------------------------------------------------------------------------------------------------------------------------------------------------------------------------------------------------------------------------------------------------------------------------------------------------|
| Technical Readiness & Maturity | <ul style="list-style-type: none"> <li>• Usability</li> <li>• User experience</li> <li>• User-centred design</li> <li>• Suitability</li> <li>• Reliability</li> </ul>                                                                                                                                                                | <ul style="list-style-type: none"> <li>• User support</li> <li>• Compliance with interoperability standards</li> <li>• Clinical Integration (IT and protocols)</li> <li>• Implementation reliability</li> </ul>                                                                                                                                  | <ul style="list-style-type: none"> <li>• Compliance (interoperability standards, certifications)</li> <li>• Technical validity and precision</li> <li>• Reliability of measures</li> <li>• Replicability</li> </ul>                                                           | <ul style="list-style-type: none"> <li>• Legal compliance (data protection)</li> <li>• Regulatory compliance (if medical device)</li> </ul>                                                                                                                                                                               |
| Risks                          | <ul style="list-style-type: none"> <li>• Technical (security, privacy, electricity-related)</li> <li>• Clinical and behavioural</li> <li>• Inadequate contents (lack of updates, evidence-based functions or information)</li> <li>• Economic (inc. costs, time)</li> <li>• Ethical (stigma due to visibility of devices)</li> </ul> | <ul style="list-style-type: none"> <li>• Technical (data-related: leak, loss, error; electricity-related)</li> <li>• Decrease in quality of care (not integrated or in contradiction with operating pathways, protocols)</li> <li>• Economical (increased costs if the solution is not cost-effective, or due to overuse of services)</li> </ul> | <ul style="list-style-type: none"> <li>• Decrease in quality of care (ineffective solutions)</li> <li>• Economical (increased costs due to technical or clinical cost, overuse of services)</li> <li>• Inequality of access (if cost for the end user is too high)</li> </ul> | <ul style="list-style-type: none"> <li>• Inequality of access</li> <li>• Unintended consequences (environmental changes)</li> <li>• Over-diagnosis</li> </ul>                                                                                                                                                             |
| Benefits                       | <ul style="list-style-type: none"> <li>• Health</li> <li>• Behavioural change (lifestyles, self-management)</li> <li>• Empowerment and satisfaction</li> <li>• Improved access to care (waiting lists)</li> <li>• Economical (cost and time savings)</li> </ul>                                                                      | <ul style="list-style-type: none"> <li>• Process and workflow improvements</li> <li>• Quality improvements (higher case resolution, decreased hospitalization rates)</li> <li>• Economical (cost and time savings, budgetary impact)</li> <li>• User satisfaction</li> </ul>                                                                     | <ul style="list-style-type: none"> <li>• Improved quality of coordinate care</li> <li>• Economical (cost and time savings, cost-effectiveness)</li> <li>• Improved general health (decreased disease prevalence and incidence, QALYs gained)</li> </ul>                       | <ul style="list-style-type: none"> <li>• Decrease prevalence, increase awareness</li> <li>• Increased productivity (decreased disability rates, lost work days)</li> <li>• Economical (cost and time savings)</li> <li>• Improved research focus</li> <li>• Enhanced collaboration through information sharing</li> </ul> |
| Resources needed               | <ul style="list-style-type: none"> <li>• Technical literacy</li> <li>• Training</li> <li>• Cost paid by the user (or financial support structure)</li> </ul>                                                                                                                                                                         | <ul style="list-style-type: none"> <li>• Training provision</li> <li>• Logistics</li> <li>• Initial investment costs (devices, infrastructure, network)</li> </ul>                                                                                                                                                                               | <ul style="list-style-type: none"> <li>• Training provision</li> <li>• Initial investment costs (devices, infrastructure, network)</li> </ul>                                                                                                                                 | <ul style="list-style-type: none"> <li>• Medical culture changes</li> </ul>                                                                                                                                                                                                                                               |
